# Supplementary material
Source: PubMed Central journal article supplement (PMC4764422)
Supplement: NIHMS753344-supplement-Supplemental_Data_File___doc___tif__pdf__etc__.pdf [file NIHMS753344-supplement-Supplemental_Data_File___doc___tif__pdf__etc__.pdf]

## Supplemental Results

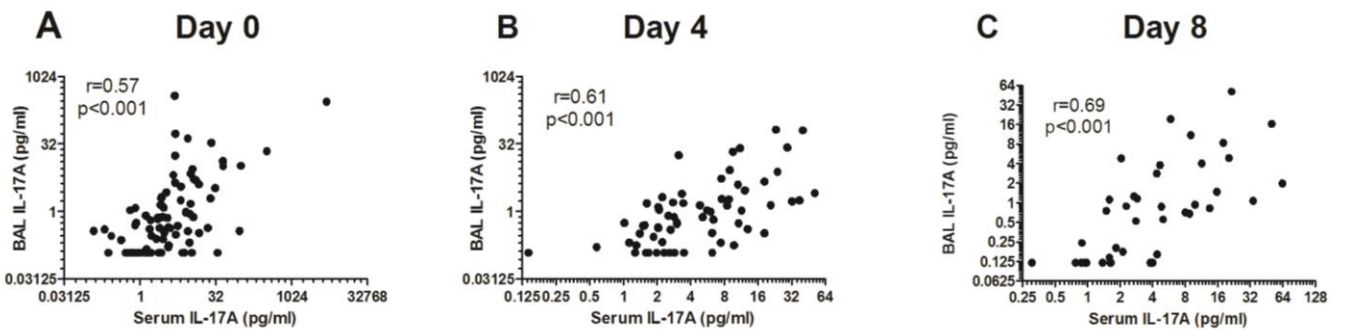

**Supplemental Figure 1. Serum and BAL IL-17A levels are highly correlated.** ARDS1 subjects were enrolled within 48 hours of ARDS onset and bronchoalveolar lavage fluid and peripheral blood were obtained on days 0, 4, and 8 after enrollment. IL-17A concentration was measured by electrochemiluminescence (Meso Scale Discovery, Gaithersburg, MD). Association testing between log base-2 transformed BAL IL-17A concentration and log base-2 transformed serum IL-17A concentration was performed using a Pearson's correlation ( $r$ ). Serum and BAL IL-17A levels were significantly correlated on day zero (A), day four (B), and day 8 (C).

**Supplemental Table 1. Source of suspected infection and presence of septic shock for subjects with Sepsis Associated ARDS**

|                                     | ARDS1, N (%) | ARDS2, N (%) |
|-------------------------------------|--------------|--------------|
| Sepsis (SIRS + suspected infection) | 56           | 113          |
| Septic Shock                        | 11 (20)      | 47 (41)      |
| Source of sepsis <sup>a</sup>       |              |              |
| Pneumonia                           | 36 (64)      | 63 (56)      |
| Bacteremia                          | 13 (23)      | 9 (8)        |
| Abdominal                           | 3 (5)        | 4 (3)        |
| Genitourinary                       | 9 (16)       | 4 (3)        |
| Soft Tissue/Bone                    | 9 (16)       | 4 (3)        |
| CSF                                 | 1 (2)        | 0            |
| Unknown                             | 2 (3)        | 29 (26)      |
| Infectious Pathogen                 |              |              |
| Gram positive                       | 16 (28)      | 25 (22)      |
| Gram negative                       | 4 (9)        | 11 (10)      |
| Polymicrobial                       | 7 (12)       | 12 (11)      |
| Other                               | 3 (5)        | 8 (7)        |
| Unknown                             | 26 (46)      | 57 (50)      |

<sup>a</sup> Sources of infection are not mutually exclusive

**Supplemental Table 2. Association between IL-17A concentration and alveolar neutrophils on day 4 and day 8**

| Log2 (IL-17A)       | N  | % Alveolar Neutrophils <sup>a</sup> |        |
|---------------------|----|-------------------------------------|--------|
|                     |    | $\beta$ (95% CI)                    | p      |
| <b>BAL IL-17A</b>   |    |                                     |        |
| Day 4               | 63 | 5.8 (2.8-8.8)                       | <0.001 |
| Day 8               | 39 | 10 (6.6-14)                         | <0.001 |
| <b>Serum IL-17A</b> |    |                                     |        |
| Day 4               | 68 | 5.8 (1.1-10)                        | 0.02   |
| Day 8               | 41 | 9.4 (3.5-15)                        | 0.002  |

<sup>a</sup> Linear regression between log-2 transformed IL-17A concentration and percent alveolar neutrophils. Analyses compare paired day 4 IL-17A concentration with day 4 percentage of alveolar neutrophils and paired day 8 IL-17A concentration with day 8 percentage of alveolar neutrophils.

**Supplemental Table 3. Association between IL-17A concentration and alveolar protein content on day 0, day 4, and day 8**

| Log2 (IL-17A)       | N  | Alveolar Protein<br>$\beta$ (95% CI) <sup>a</sup> | p      | Adj. $\beta$ (95% CI) <sup>b</sup> | Adj. p <sup>b</sup> |
|---------------------|----|---------------------------------------------------|--------|------------------------------------|---------------------|
| <b>BAL IL-17A</b>   |    |                                                   |        |                                    |                     |
| Day 0               | 82 | 0.07 (0.02-0.11)                                  | <0.007 | 0.08 (0.03-0.13)                   | 0.002               |
| Day 4               | 63 | 0.12 (0.07-0.18)                                  | <0.001 | 0.13 (0.06-0.19)                   | <0.001              |
| Day 8               | 39 | 0.14 (0.06-0.21)                                  | 0.001  | 0.13 (0.05-0.21)                   | 0.003               |
| <b>Serum IL-17A</b> |    |                                                   |        |                                    |                     |
| Day 0               | 85 | 0.03 (-0.03-0.08)                                 | 0.34   | 0.04 (-0.02-0.10)                  | 0.18                |
| Day 4               | 64 | 0.002 (-0.09-0.09)                                | 0.95   | -0.02 (-0.12-0.08)                 | 0.63                |
| Day 8               | 40 | 0.10 (-0.01-0.21)                                 | 0.08   | 0.09 (-0.03-0.21)                  | 0.15                |

<sup>a</sup> Linear regression between log-2 transformed IL-17A concentration and log-10 transformed total alveolar protein concentration. Analyses compare paired day 0 IL-17A concentration with day 0 protein, paired day 4 IL-17A with day 4 protein, and paired day 8 IL-17A concentration with day 8 protein.

<sup>b</sup> Adjusted for age, gender, race, treatment group, sepsis, APACHE II score

**Supplemental Table 4. Association between IL-17A concentration and percent alveolar neutrophils in direct or indirect lung injury.**

| Log2 (IL-17A) | N  | % Alveolar Neutrophils <sup>a</sup> |        |
|---------------|----|-------------------------------------|--------|
|               |    | $\beta$ (95% CI)                    | p      |
| BAL IL-17A    |    |                                     |        |
| Direct        | 42 | 3.7 (0.6-6.8)                       | 0.02   |
| Indirect      | 38 | 7.6 (4.2-11)                        | <0.001 |
| Serum IL-17A  |    |                                     |        |
| Direct        | 45 | 4.8 (1.1-8.6)                       | 0.01   |
| Indirect      | 38 | --                                  | NS     |

<sup>a</sup> Linear regression between log-2 transformed IL-17A concentration and percent alveolar neutrophils in subgroups with direct ARDS (aspiration, inhalation, drowning, pneumonia) or indirect ARDS.

**Supplemental Table 5. Increasing IL-17A concentration is associated with increased risk of Sepsis-Associated ARDS**

| Group         | OR (95% CI) <sup>a</sup> | P Value | Adjusted OR (95% CI) <sup>b</sup> | P Value |
|---------------|--------------------------|---------|-----------------------------------|---------|
| ARDS 1        |                          |         |                                   |         |
| Serum IL-17A  | 1.44 (1.11-1.87)         | 0.006   | 1.58 (1.17-2.13)                  | 0.003   |
| BAL IL-17A    | 1.37 (1.09-1.73)         | 0.008   | 1.39 (1.09-1.78)                  | 0.008   |
| ARDS 2        |                          |         |                                   |         |
| Plasma IL-17A | 1.28 (0.99-1.66)         | 0.057   | 1.34 (1.02-1.76)                  | 0.035   |

ARDS = Acute Respiratory Distress Syndrome; OR = odds ratio; CI = 95% confidence interval; BAL = bronchoalveolar lavage; APACHE = Acute Physiology and Chronic Health Evaluation.

<sup>a</sup>Logistic between Log-2 transformed IL-17A and sepsis-associated ARDS

<sup>b</sup> Adjusted for ARDS 1: Age, gender, race, treatment group, sepsis, APACHE II or ARDS 2: Age, gender, sepsis, APACHE III
